# Supplementary material for: Effects of silver-decorated PLGA nanoparticles on Staphylococcus epidermidis biofilms and evaluation of the detoxification limit of bacteria against these nanoparticles
Source: Royal Society of Chemistry journal article supplement (doi:10.1039/d4na00249k), 2024-01-01
Supplement: d4na00249k1.pdf [file d4na00249k1.pdf]

## Supplementary Material

**Article Title: Effects of silver-decorated PLGA nanoparticles on *Staphylococcus epidermidis* biofilms and evaluation of detoxification limit of bacteria against these nanoparticles**

**Chisato Takahashi<sup>1\*</sup>, Keiichi Moriguchi<sup>2,3</sup>**

<sup>1</sup>Department of Materials and Chemistry, National Institute of Advanced Industrial Science and Technology (AIST), 4-205, Sakura-zaka, Moriyama-ku, Nagoya, Aichi 463-8560, Japan

<sup>2</sup>Department of Rehabilitation, Faculty of Health and Sciences, Wakayama Professional University of Rehabilitation, Minato-machi, Wakayama-shi, Wakayama 640-8222, Japan

<sup>3</sup>Department of Oral Anatomy, School of Dentistry, Aichi Gakuin University, 1-100, Kusumoto-cho, Chikusa-ku, Nagoya, Aichi 464-8650, Japan

**\* Correspondence:**

Corresponding Author

chisa-takahashi@aist.go.jp

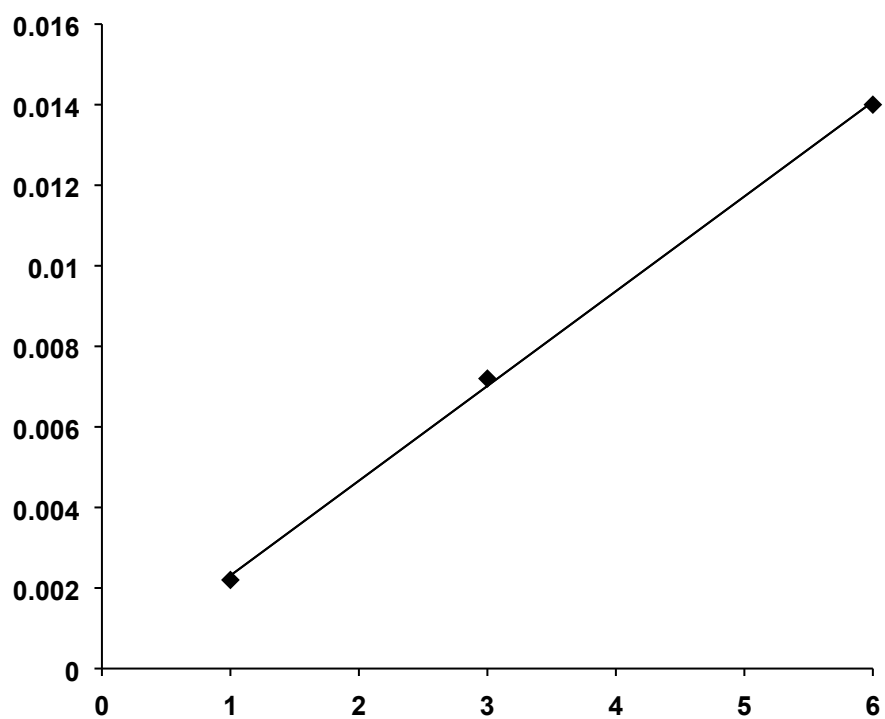

**Figure S1. Silver ions standard curve measured by an AAS.**

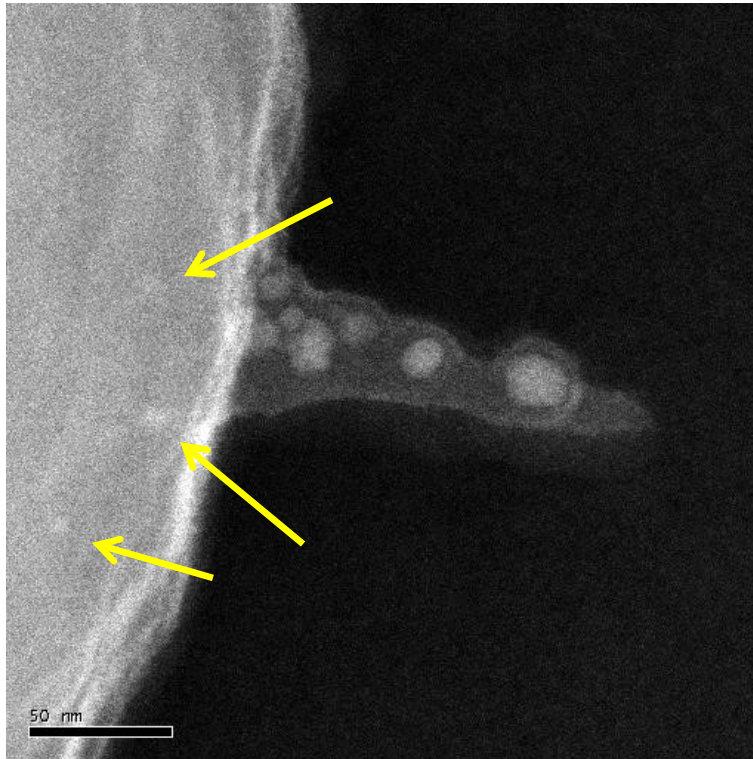

**Figure S2. ADF-STEM image of the biofilms after treatment of Ag PLGA nanoparticles for 30 min. Silver nanoparticles are incorporated within the fibril, and it is evident that the fibril adapts their shape to align with the morphology of silver nanoparticles.**

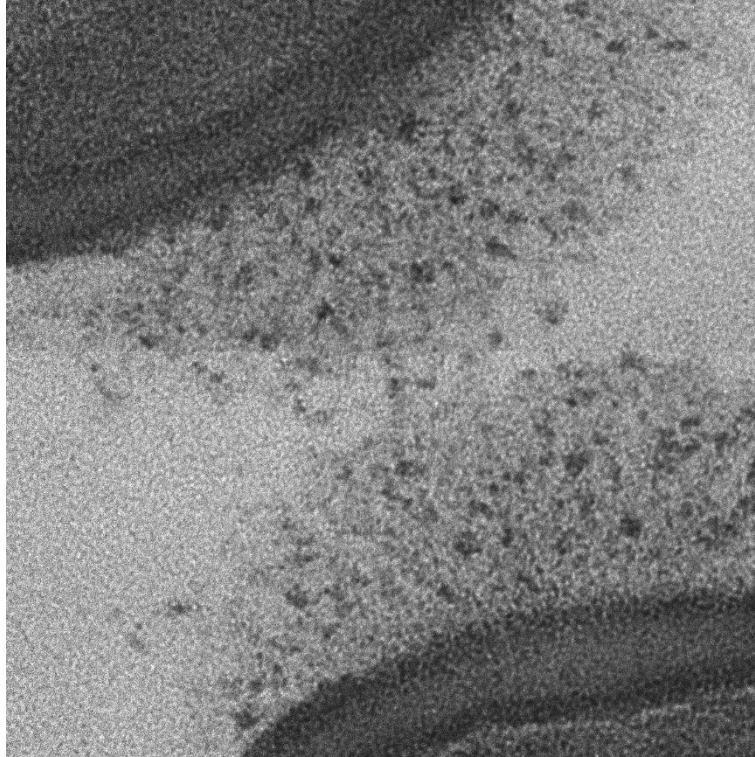

**Figure S3. TEM image of the biofilms after treatment of Ag PLGA nanoparticles for 2 h.**
